# Supplementary material for: Feasible nonaqueous route to synthesize a high-voltage spinel cathode material for lithium ion batteries
Source: Royal Society of Chemistry journal article supplement (doi:10.1039/c4ra09334h), 2014-12-10
Supplement: c4ra09334h1.pdf [file c4ra09334h1.pdf]

**Supporting Information Available.**

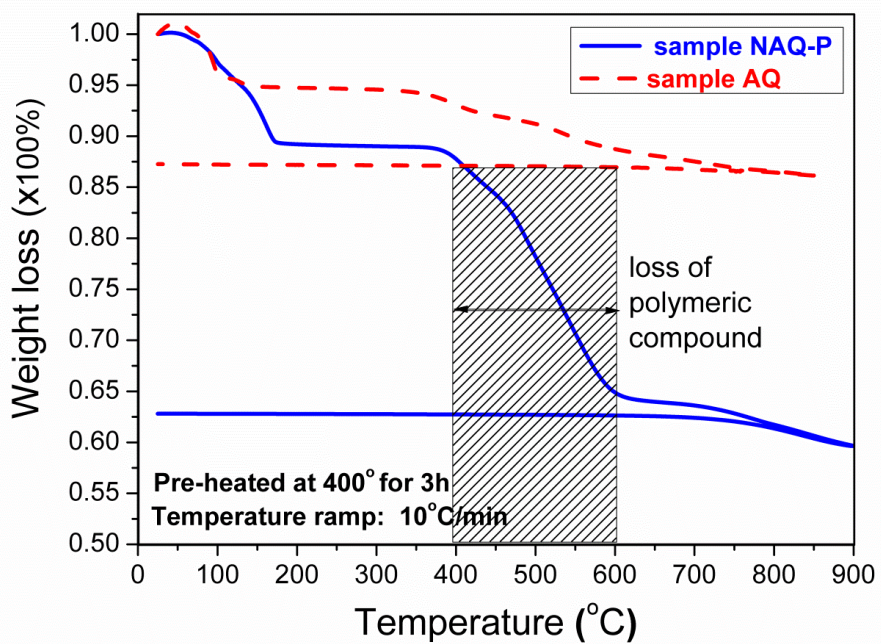

**Figure S1.** TGA curve of samples AQ and NAQ-P from R.T. to 900 °C with temperature ramp of 10 °C · min<sup>-1</sup>.

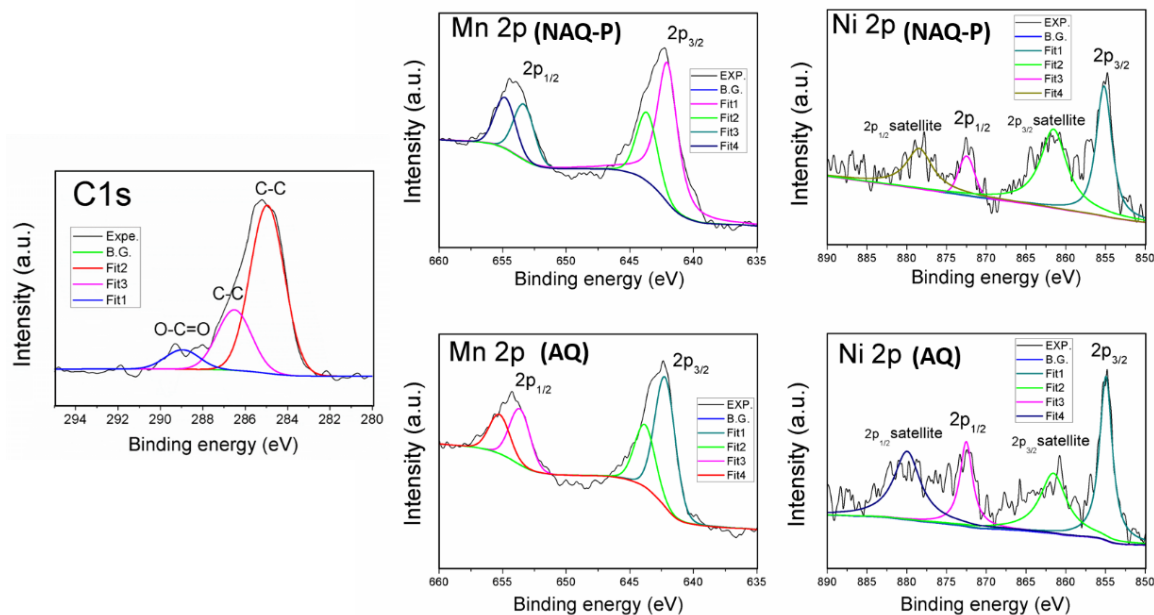

**Figure S2.** XPS spectra of Ni 2p and Mn 2p in samples AQ and NAQ-P with the fitted curves (corrected by C 1s spectrum)

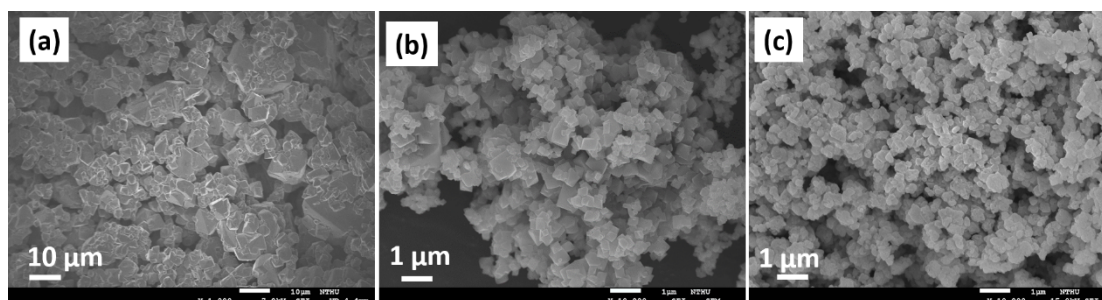

**Figure S3.** SEM images of as-fabricated spinel powder (a) NAQ, (b) AQ and (c) NAQ-P

**Table S1.** The calculated particle size data

| Samples | Average particle sizes (μm) | Absolute size deviations (μm) | Maximum particle sizes (μm) | Minimum particle sizes (μm) |
|---------|-----------------------------|-------------------------------|-----------------------------|-----------------------------|
| NAQ     | 3.98                        | 4.62                          | 10.58                       | 0.47                        |
| AQ      | 0.35                        | 0.34                          | 1.55                        | 0.15                        |
| NAQ-P   | 0.31                        | 0.18                          | 0.69                        | 0.13                        |
